# Supplementary material for: Characterization of moose intestinal glycosphingolipids
Source: PubMed Central journal article supplement (PMC4515253; doi:10.1007/s10719-015-9604-8), 2015-06-24

Fig. S1

A. N2-IV

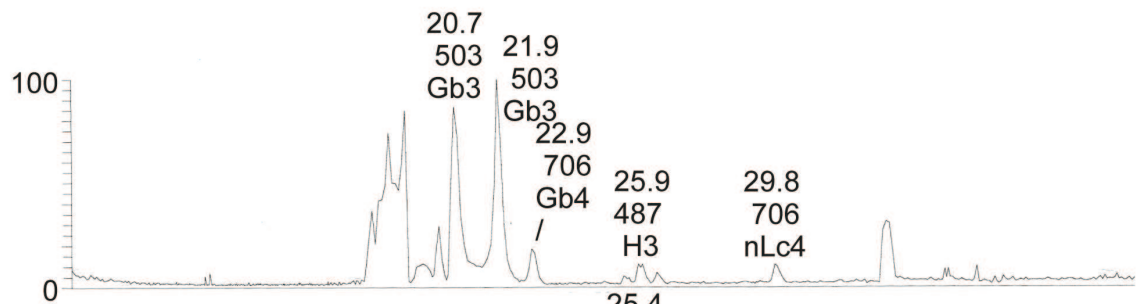

B. N2-VII

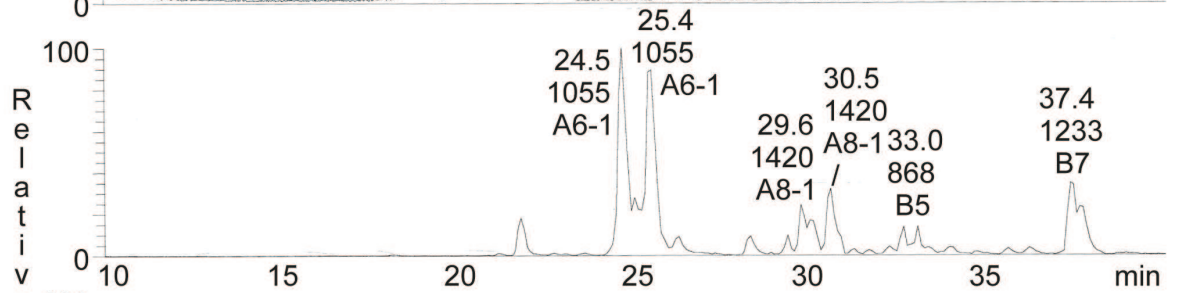

C. N2-IV  
m/z 690  
RT 19.6 min

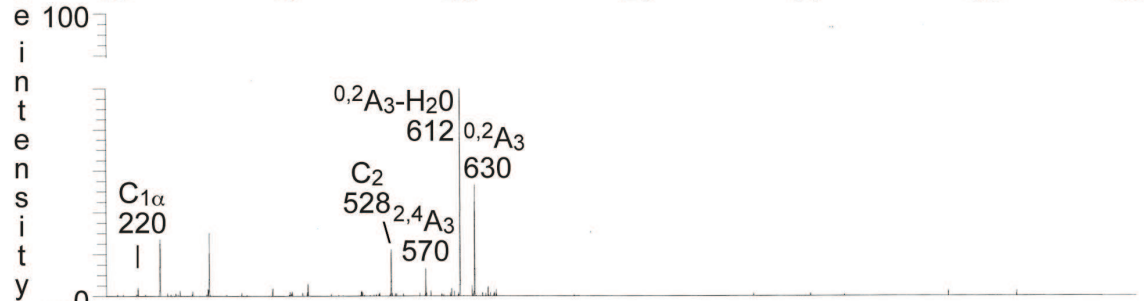

D. N2-VII  
m/z 1055  
RT 24.9 min

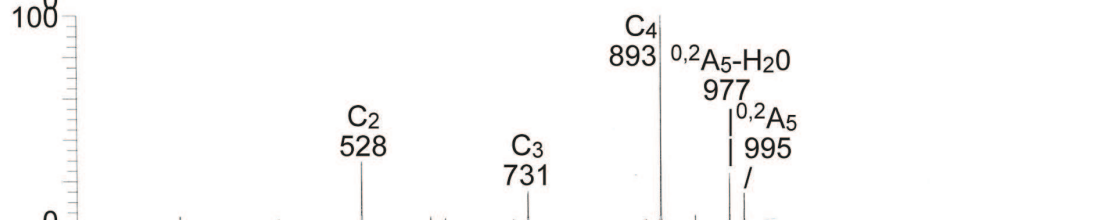

E. N2-VII  
m/z 1420  
RT 29.9 min

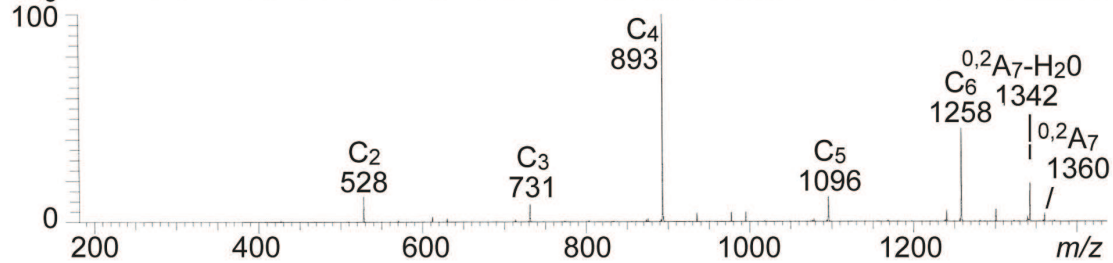

F. HexNAc-O-Hex-O-Hex [M-H<sup>+</sup>]=690

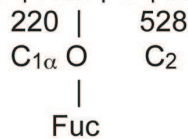

HexNAc-O-Hex-O-HexNAc-O-Hex-O-Hex [M-H<sup>+</sup>]=1055

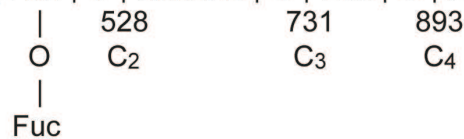

HexNAc-O-Hex-O-HexNAc-O-Hex-O-HexNAc-O-Hex-O-Hex [M-H<sup>+</sup>]=1420

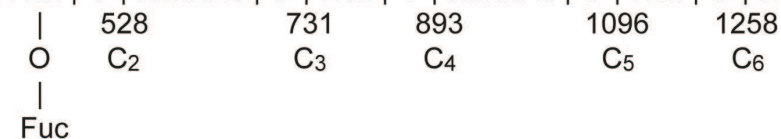

Supplement: 10719_2015_9604_MOESM1_ESM.pdf [file 10719_2015_9604_MOESM1_ESM.pdf]
