# Supplementary material for: Characterization of moose intestinal glycosphingolipids
Source: PubMed Central journal article supplement (PMC4515253; doi:10.1007/s10719-015-9604-8), 2015-06-24

Fig. S3

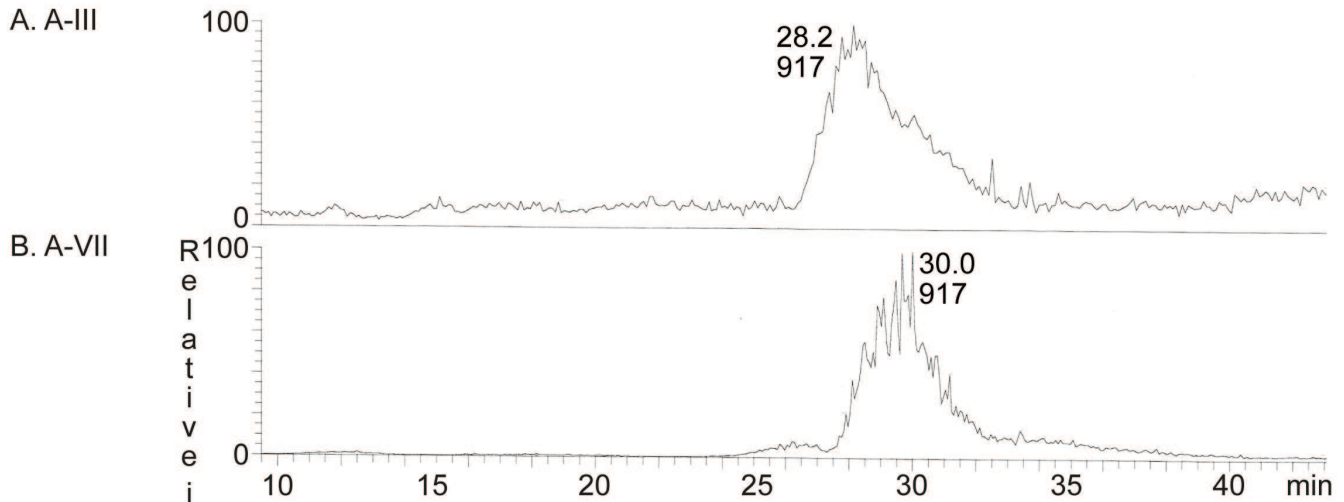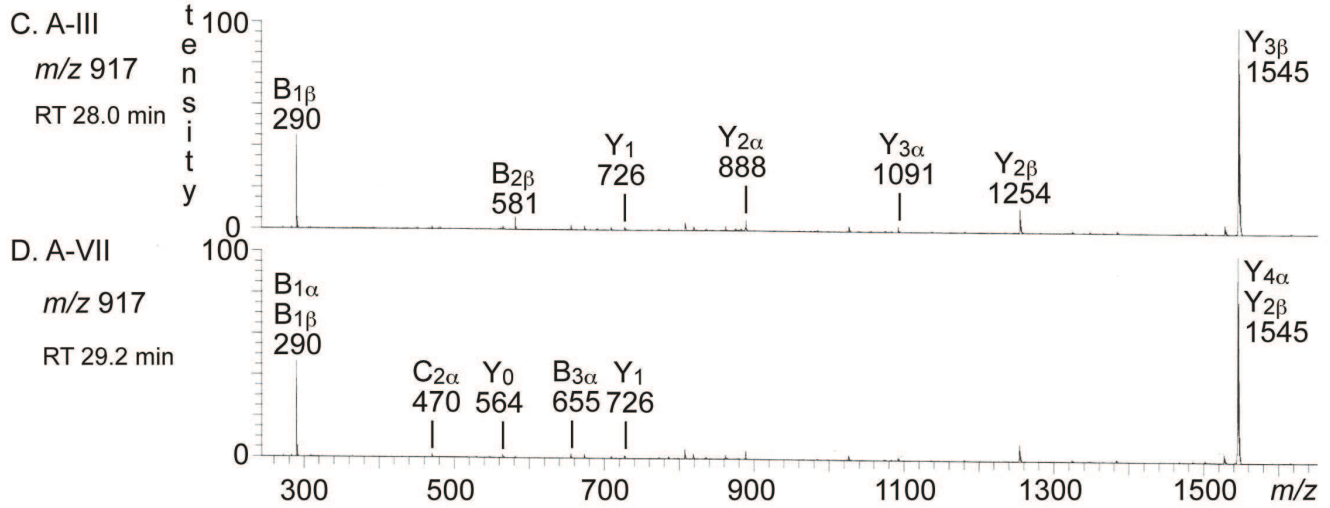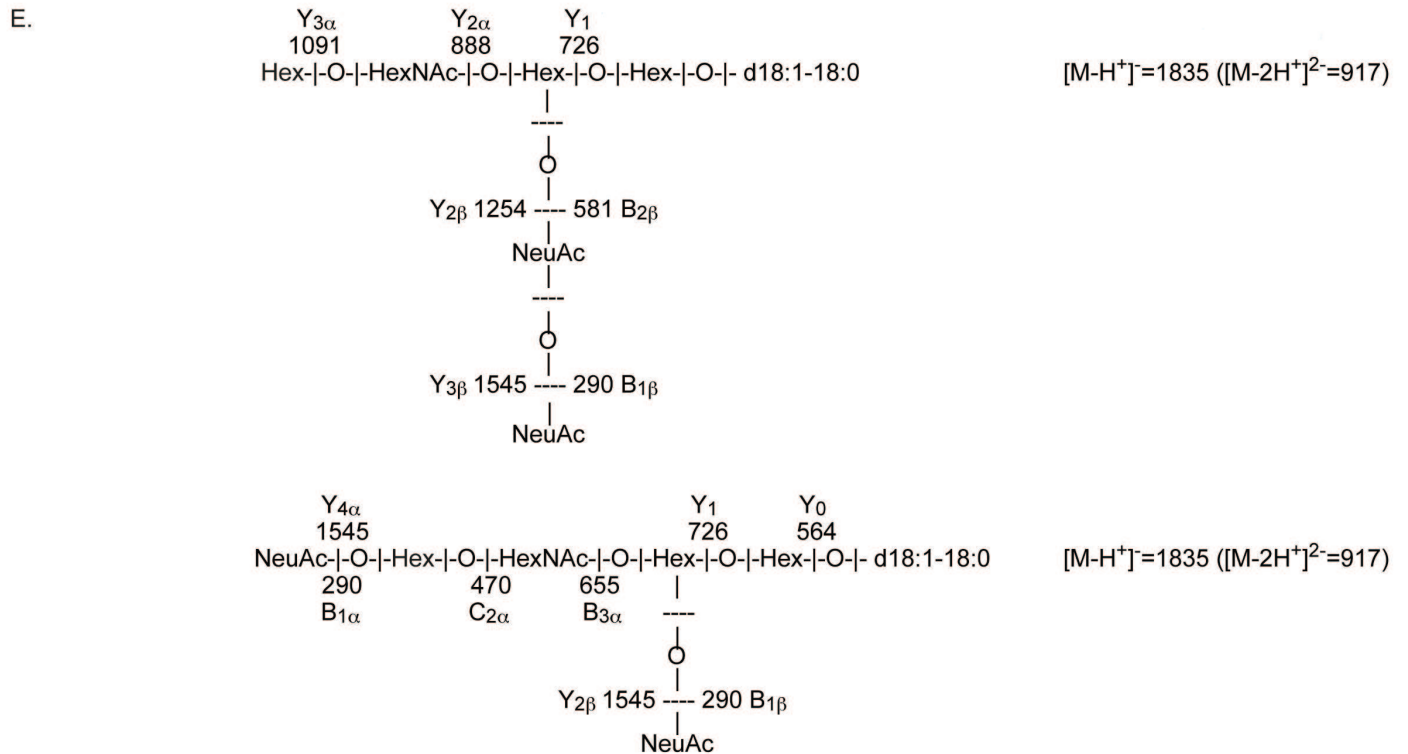

Supplement: 10719_2015_9604_MOESM3_ESM.pdf [file 10719_2015_9604_MOESM3_ESM.pdf]
